# Supplementary material
Source: HighWire-hosted journal article supplement (https://hw-f5-jim.highwire.org/content/69/6/1238)
Supplement: inline-supplementary-material-1 [file inline-supplementary-material-1.pdf]

## Supplemental digital content

Figure S1 A,B. The association between CD4 and K/T (top), and CD4 nadir and K/T (bottom)

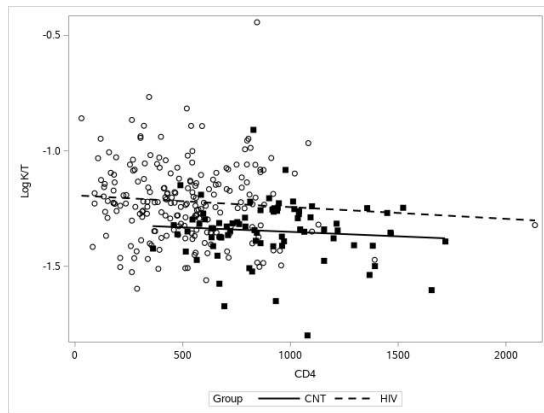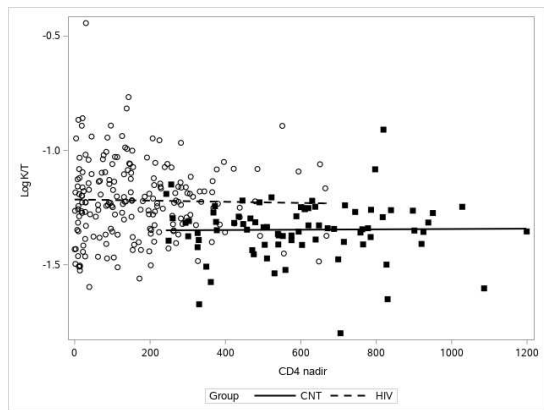

Figure S1 A,B. There was not a significant association between K/T and CD4 ( $p=0.16$ ) or CD4 nadir ( $p=0.84$ ). K= kynurenine, T=tryptophan
