# Supplementary material
Source: HighWire-hosted journal article supplement (https://hw-f5-jim.highwire.org/content/69/6/1238)
Supplement: inline-supplementary-material-2 [file inline-supplementary-material-2.pdf]

## Supplemental digital content

Figure S2. Association between Neopterin and K/T

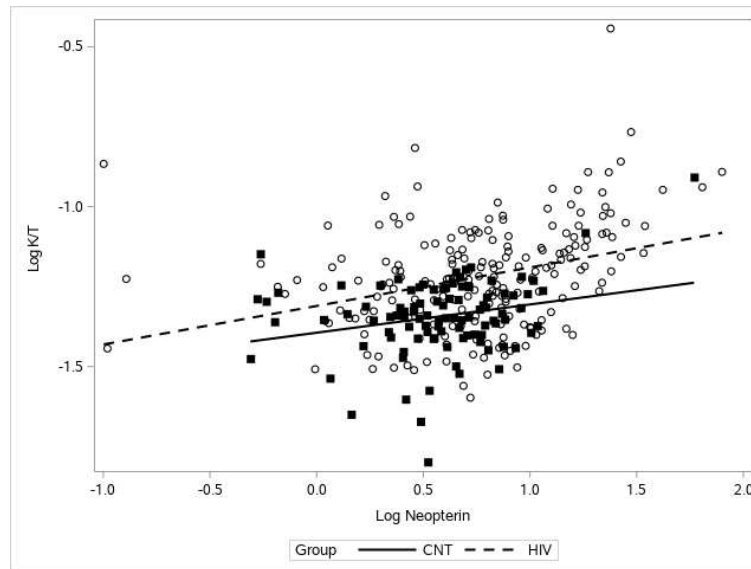Figure S2: As neopterin increases K/T increases for all subjects ( $p < 0.0001$ ). K= kynurenine, T=tryptophan
